# Supplementary material for: Preparation of ZnFe2O4 nanostructures and highly efficient visible-light-driven hydrogen generation with the assistance of nanoheterostructures
Source: Royal Society of Chemistry journal article supplement (doi:10.1039/c5ta00737b), 2015-01-01
Supplement: c5ta00737b1.pdf [file c5ta00737b1.pdf]

## Supporting Information

### Preparation of $\text{ZnFe}_2\text{O}_4$ nanostructures and high efficient visible-light-driven hydrogen generation with the assistance of nanoheterostructures

Hui Song, Liping Zhu\*, Yaguang Li, Zirui Lou, Mu Xiao, Zhizhen Ye

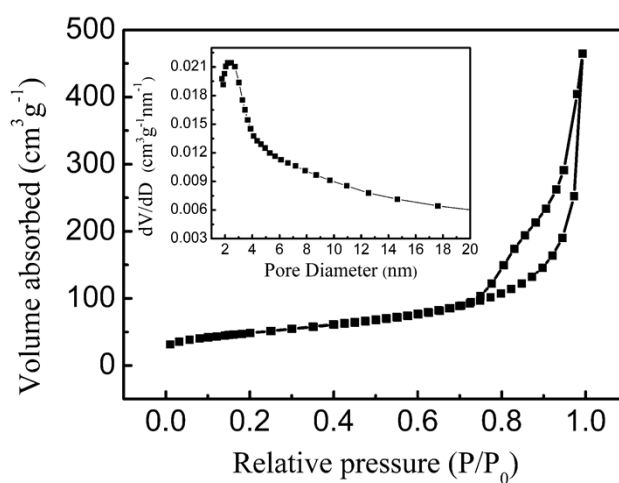

Fig. S1. Nitrogen adsorption-desorption isotherms and corresponding pore diameter distribution curves (inset) of  $\text{ZnFe}_2\text{O}_4$  nanostructures.

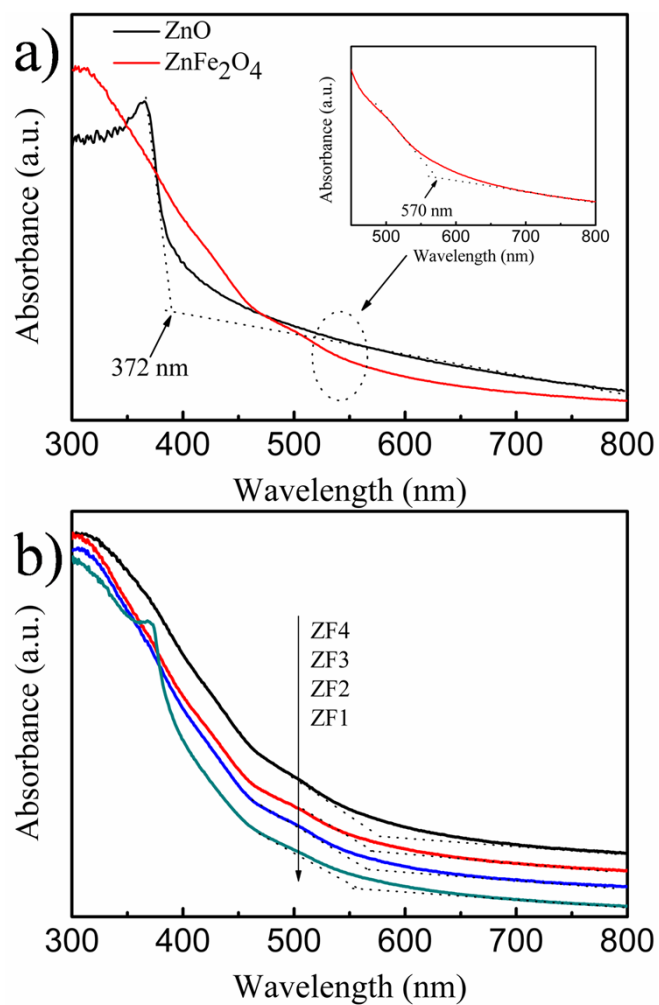

Fig. S2. a) UV-vis diffuse absorption spectra of  $\text{ZnFe}_2\text{O}_4$  and  $\text{ZnO}$ , b) UV-vis diffuse absorption spectra of sample ZF1, ZF2, ZF3, ZF4.

**Table S1.** The bang gap of the as-prepared samples

| Samples                   | Absorption edge<br>( $\lambda$ )/nm | Bang gap ( $E_g$ )/eV <sup>a</sup> |
|---------------------------|-------------------------------------|------------------------------------|
| $\text{ZnFe}_2\text{O}_4$ | 570                                 | 2.18                               |
| $\text{ZnO}$              | 372                                 | 3.33                               |
| ZF1                       | 567                                 | 2.19                               |
| ZF2                       | 564                                 | 2.20                               |
| ZF3                       | 562                                 | 2.21                               |
| ZF4                       | 557                                 | 2.23                               |

<sup>a</sup>Bang gap ( $E_g$ )= $1240/\lambda$

**Table S2.** Comparison of photocatalytic activity in hydrogen generation over ZnFe<sub>2</sub>O<sub>4</sub>-based photocatalytic.

| Photocatalyst                                                           | Incident light                                   | Reactant solution             | Cocatalyst | H <sub>2</sub> generation rate ( $\mu\text{mol h}^{-1} \text{g}^{-1}$ ) | Ref.      |
|-------------------------------------------------------------------------|--------------------------------------------------|-------------------------------|------------|-------------------------------------------------------------------------|-----------|
| ZnFe <sub>2</sub> O <sub>4</sub> nanostructures                         | $\lambda > 420\text{nm}$<br>300 W<br>Xe-lamp     | 10 vol%<br>CH <sub>3</sub> OH | -          | 280                                                                     | This work |
| ZnFe <sub>2</sub> O <sub>4</sub> /ZnO nanoheterostructures (sample ZF2) | $\lambda > 420\text{nm}$<br>300 W<br>Xe-lamp     | 10 vol%<br>CH <sub>3</sub> OH | -          | 2150                                                                    | This work |
| ZnFe <sub>2</sub> O <sub>4</sub> nanorod                                | $\lambda > 420\text{nm}$<br>250 W<br>Xe-lamp     | 17 vol%<br>CH <sub>3</sub> OH | -          | 47.57                                                                   | 1         |
| ZnFe <sub>2</sub> O <sub>4</sub> spherical particles                    | $\lambda > 420\text{nm}$<br>250 W<br>UV-vis lamp | Sodium sulfite (0.05 M)       | -          | 20                                                                      | 2         |

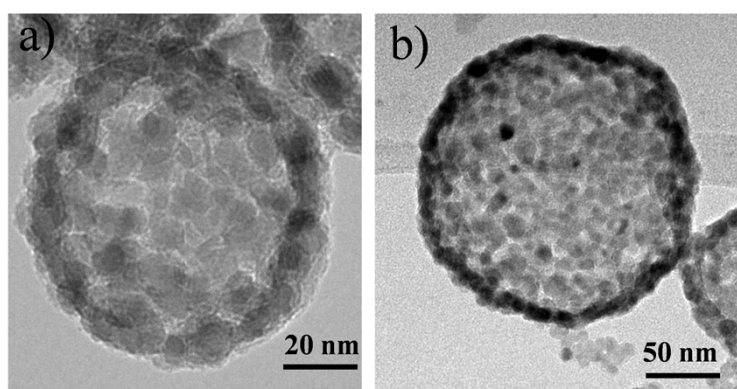

Fig. S3 The HRTEM images of different size of ZnFe<sub>2</sub>O<sub>4</sub> nanospheres

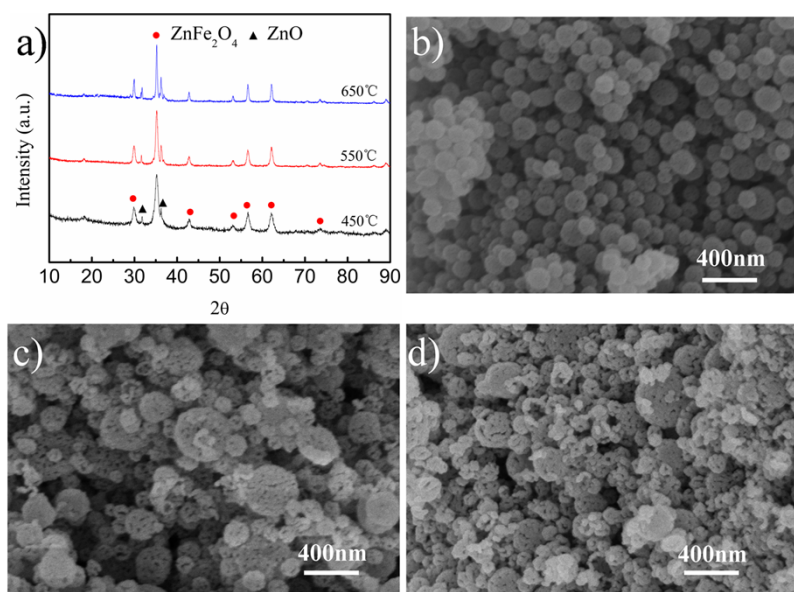

Fig. S4 a) The XRD pattern of sample ZF1 annealed at 450, 550 and 650 °C. b,c,d) the SEM images of sample ZF1 annealed at 450, 550 and 650 °C.

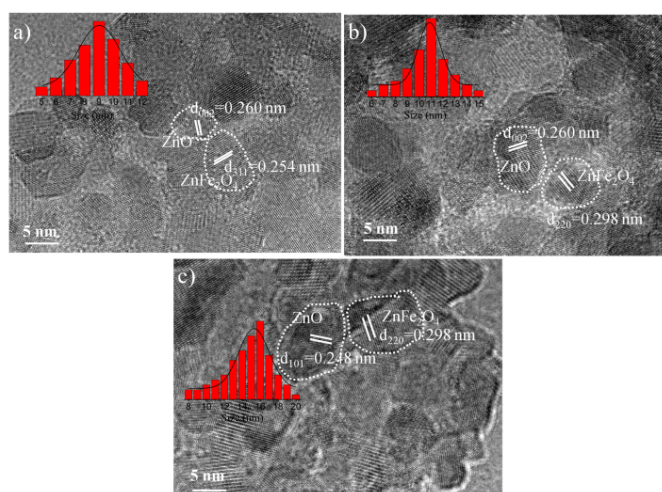

Fig. S5. a), b) and c) are the HRTEM images of sample ZF1, sample ZF3, and sample ZF4, respectively.

**Table S3.** The turnover number (TON) based on catalysts under visible light irradiation ( $\lambda > 420$  nm) within 5 h.

| Samples                          | TON <sup>a</sup> |
|----------------------------------|------------------|
| ZnFe <sub>2</sub> O <sub>4</sub> | 0.34             |
| ZF1                              | 1.44             |
| ZF2                              | 2.97             |
| ZF3                              | 1.35             |
| ZF4                              | 0.31             |

<sup>a</sup>TON= Number of generated H<sub>2</sub> molecules / Number of ZnFe<sub>2</sub>O<sub>4</sub> molecules.

**Table S4.** The hydrogen generation rate of the as-prepared samples under simulated solar light irradiation.

| Samples                          | Hydrogen generation rate<br>(mmol h <sup>-1</sup> g <sup>-1</sup> ) |
|----------------------------------|---------------------------------------------------------------------|
| ZnFe <sub>2</sub> O <sub>4</sub> | 0.35                                                                |
| ZF1                              | 1.37                                                                |
| ZF2                              | 2.68                                                                |
| ZF3                              | 1.15                                                                |
| ZF4                              | 0.83                                                                |
| ZnO                              | 0.18                                                                |

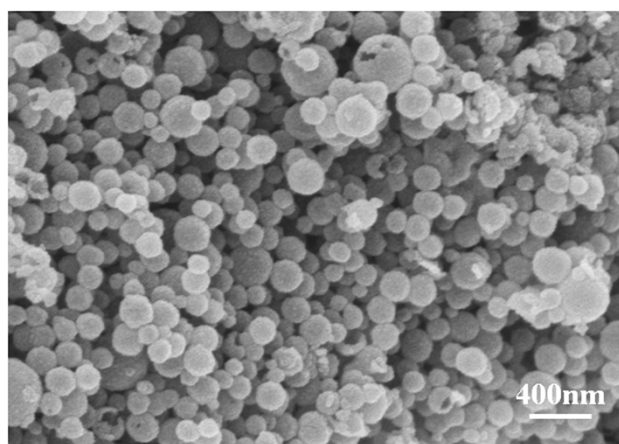

Fig. S6. Typical SEM images of ZnFe<sub>2</sub>O<sub>4</sub>/ZnO nanoheterostructures (sample ZF2) after photocatalytic reaction.

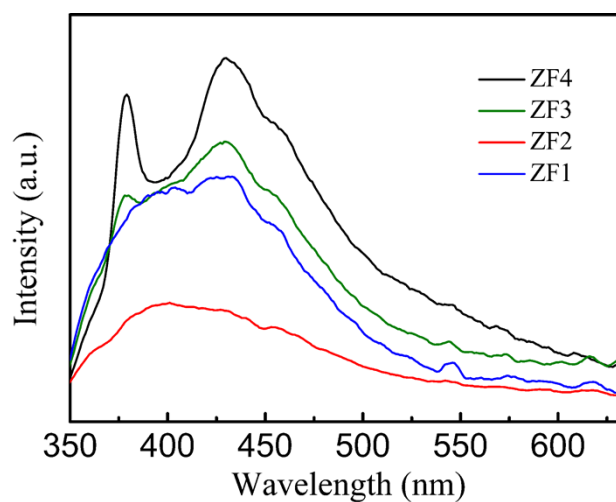

Fig. S7. The PL spectra of sample ZF1, sample ZF2, sample ZF3, and sample ZF4.

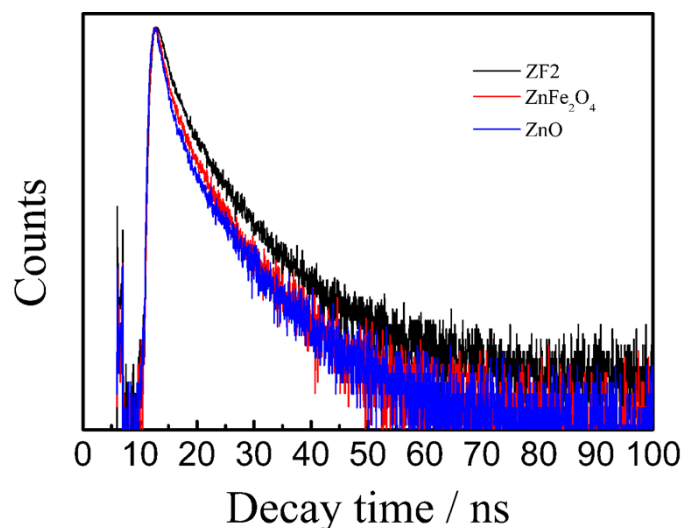

Fig. S8 Photoluminescence decay curves of sample ZF2, ZnFe<sub>2</sub>O<sub>4</sub>, ZnO.

Table S5 The photoluminescence decay time of all the samples derived from the time-resolved photoluminescence spectroscopy.

| Sample                           | Decay time (ns) |          |          | Relative amplitude (%) |        |         | Average life ( $\langle\tau\rangle$ , ns) <sup>a</sup> | $\chi^2$ |
|----------------------------------|-----------------|----------|----------|------------------------|--------|---------|--------------------------------------------------------|----------|
|                                  | $\tau_1$        | $\tau_2$ | $\tau_3$ | $f_1$                  | $f_2$  | $f_3$   |                                                        |          |
| ZnFe <sub>2</sub> O <sub>4</sub> | 1.6305          | 5.6658   | 12.6384  | 46.24                  | 37.29  | 16.47   | 7.98                                                   | 1.172    |
| ZF1                              | 1.608           | 5.4223   | 14.4415  | 0.1826                 | 0.5258 | 13.6529 | 10.43                                                  | 1.133    |
| ZF2                              | 1.4723          | 6.4067   | 18.9043  | 0.2043                 | 0.4258 | 0.3699  | 14.98                                                  | 1.285    |
| ZF3                              | 1.7274          | 5.2801   | 13.6529  | 0.2903                 | 0.4650 | 0.2447  | 9.44                                                   | 1.159    |
| ZF4                              | 1.4120          | 5.1668   | 13.5449  | 0.3162                 | 0.4946 | 0.1892  | 8.72                                                   | 1.170    |
| ZnO                              | 1.6197          | 5.1443   | 11.9333  | 0.3437                 | 0.4749 | 0.1814  | 7.61                                                   | 1.152    |

<sup>a</sup>The average lifetime was calculated using equation:  $\langle\tau\rangle=(f_1\tau_1^2+f_2\tau_2^2+f_3\tau_3^2)/(f_1\tau_1+f_2\tau_2+f_3\tau_3)$

$\chi^2$ : the goodness of fit parameter.

## References

1. H. Lv, L. Ma, P. Zeng, D. Ke and T. Peng, *Journal of Materials Chemistry*, 2010, **20**, 3665.
2. X. Xu, A. K. Azad and J. T. S. Irvine, *Catalysis Today*, 2013, **199**, 22-26.
